1 **A novel cryo-electron microscopy support film based on 2D**  
2 **crystal of HFBI protein**

3 Hongcheng Fan <sup>1,3</sup>, Bo Wang<sup>2</sup>, Yan Zhang<sup>1,3</sup>, Yun Zhu<sup>1,3</sup>, Bo Song<sup>2</sup>, Haijin Xu<sup>2</sup>, Yujia  
4 Zhai<sup>1,3</sup>, Mingqiang Qiao<sup>2,7\*</sup>, Fei Sun<sup>1,2,3,4,5,6\*</sup>

5 <sup>1</sup> National Key Laboratory of Biomacromolecules, CAS Center for Excellence in  
6 Biomacromolecules, Institute of Biophysics, Chinese Academy of Sciences, Beijing  
7 100101, China.

8 <sup>2</sup> The Key Laboratory of Molecular Microbiology and Technology, Ministry of  
9 Education, College of Life Sciences, Nankai University, Tianjin 300071, China.

10 <sup>3</sup> University of Chinese Academy of Sciences, Beijing, China.

11 <sup>4</sup> Center for Biological Imaging, Institute of Biophysics, Chinese Academy of Sciences,  
12 Beijing 100101, China;

13 <sup>5</sup> Physical Science Laboratory, Huairou National Comprehensive Science Center, No.  
14 5 Yanqi East Second Street, Beijing 101400, China

15 <sup>6</sup> Bioland Laboratory (Guangzhou Regenerative Medicine and Health Guangdong  
16 Laboratory), Guangzhou 510005, Guangdong Province, China

17 <sup>7</sup> School of Life Science, Shanxi university, Shanxi, China

18 \* Correspondence should be addressed to Fei Sun ([feisun@ibp.ac.cn](mailto:feisun@ibp.ac.cn)) and Mingqiang  
19 ([qiaomq@nankai.edu.cn](mailto:qiaomq@nankai.edu.cn)).

20

21

22

1 **Abstract**

2 **Cryo-electron microscopy (cryo-EM) has become the most powerful tool to resolve**  
3 **the high-resolution structures of biomacromolecules in solution. However, the air-**  
4 **water interface induced preferred orientation, dissociation or denaturation of**  
5 **biomacromolecules during cryo-vitrification is still a major limitation factor for**  
6 **many specimens. To solve this bottleneck, we developed a new type of cryo-EM**  
7 **support film using the 2D crystal of hydrophobin I (HFBI) protein. The HFBI-**  
8 **film utilizes its hydrophilic side to adsorb protein particles via electrostatic**  
9 **interactions and keep air-water interface away, allowing thin-enough ice and high-**  
10 **quality data collection. The particle orientation distribution can be optimized by**  
11 **changing the buffer pH. We, for the first time, solved the cryo-EM structure of**  
12 **catalase (2.28-Å) that exhibited strong preferred orientation using conventional**  
13 **cryo-vitrification protocol. We further proved the HFBI-film is suitable to solve**  
14 **the high-resolution structures of small proteins including aldolase (150 kDa, 3.34-**  
15 **Å) and hemoglobin (64 kDa, 3.6-Å). Our work implied that the HFBI-film will**  
16 **have a wide application in the future to increase the successful rate and efficiency**  
17 **of cryo-EM.**

## 1 **Introduction**

2 With the recent breakthrough and developments, cryo-electron microscopy (cryo-EM)  
3 has become a powerful technique to study the high resolution three dimensional  
4 structures of biological macromolecules in solution<sup>1</sup>. Very recent reports also  
5 demonstrated that cryo-EM can even reach to atomic resolution<sup>2,3</sup>. However, there are  
6 still bottlenecks to overcome for a more successful rate and higher efficiency. One is  
7 how to routinely prepare the suitable cryo-vitrified samples for high resolution and high  
8 quality data collection<sup>4</sup>.

9 In the cryo-vitrification procedure using the conventional holey carbon support film,  
10 many challenges occurred, including protein denature/degradation and preferred  
11 orientation induced by the air-water interface<sup>5</sup>, non-uniform/ill distribution of protein  
12 particles in the hole<sup>6</sup>, un-expected few number of particles in the hole<sup>7</sup>, not well  
13 controlled ice thickness and etc., which have become an important barrier of high  
14 resolution structure determination for many biomacromolecules by cryo-EM.

15 Past efforts have been made to solve these challenges. One approach is changing  
16 the surface property of the holey carbon support film, e.g. by glow discharging<sup>8</sup>, special  
17 treatment with surfactants or PEG<sup>9</sup>. This approach can improve the particle distribution  
18 in the hole. Multiple blotting approach was tried to increase the number of particles in  
19 the hole<sup>7</sup>. Holy metal support film, including gold film<sup>10,11</sup> and amorphous nickel  
20 titanium alloy film<sup>12</sup>, instead of carbon film, were also invented to improve the quality  
21 of the cryo-vitrified specimen. These approaches could not solve the air-water interface

1 challenge.

2 Another approach is adjoining a layer of continuous film, e.g. ultra-thin carbon<sup>13</sup>,  
3 graphene<sup>14-18</sup> or graphene derivate<sup>19,20</sup> and 2D crystal of streptavidin<sup>21,22</sup> et al., on the  
4 top of the holey carbon support film. This approach can increase the density of particles  
5 in the hole, protect the specimen away from the air-water interface, and alter the particle  
6 distribution. However, there exist non-negligible noisy background for ultra-thin  
7 amorphous carbon film, which limited the application for small proteins. In addition,  
8 the potential non-hydrophilic surface of carbon film or graphene materials would  
9 introduce a new factor to induce another preferred orientation of adsorbed particles.

10 Hydrophobins (HFBs) are a family of low molecular weight proteins (7~15 kDa)  
11 found in filamentous fungi<sup>23</sup>. HFBs contribute to the amphipathic film on the surface  
12 of fungal aerial hyphae and spores and play a key role in different physiological phases  
13 of fungi (Fig. 1a). HFBs exhibit a compact and globular structure that is stabilized by  
14 four conserved intramolecular disulfide bonds<sup>24</sup>. Interestingly, HFBs are amphiphilic  
15 proteins that display distinct hydrophobic and hydrophilic patches on the surface, which  
16 endows HFBs one family of the most surface-active proteins. HFBs can self-assemble  
17 into an amphipathic layer tightly adsorbed at the hydrophilic-hydrophobic interface  
18 such as the air-water interface or water-solid interfaces<sup>25</sup>. These unique properties of  
19 HFBs have led to many biotechnical applications including emulsions, drug delivery,  
20 tissue engineering<sup>26</sup>, biosensor<sup>27,28</sup>, protein purification/immobilization<sup>29,30</sup> and so on.  
21 According to the hydropathy patterns and the properties of self-assembled films, HFBs

1 are categorized into class I and class II<sup>31,32</sup>. The amphiphilic hydrophobin I protein  
2 (HFBI, 7.5 kDa) isolated from *Trichoderma reesei* is a kind of class II hydrophobins  
3 known to adhere to the air–water interface without denaturation and self-assemble into  
4 a crystalline mono-layer film (28 Å thickness)<sup>33</sup>. This self-assembled 2D crystal film at  
5 the air-water interface not only lowers the surface tension of the water but also has a  
6 very high surface shear elasticity that can stabilize air bubbles and foams<sup>34</sup>.

7 In the present study, we explored the potential application of HFBI to solve the air-  
8 water interface challenge in the cryo-EM field. We selected the 2D crystal of  
9 hydrophobin I as a new support film (HFBI-film) for cryo-vitrification procedure. We  
10 found that the HFBI-film is intrinsically hydrophilic with a relative low background  
11 and adsorbs protein particles via electrostatic interactions. By testing five different  
12 protein samples, apoferritin (480 kDa), glutamate dehydrogenase (340 kDa), catalase  
13 (240 kDa), aldolase (150 kDa) and hemoglobin (64 kDa), we proved that the HFBI-  
14 film can protect the specimen away from the air-water interface, solve the challenge of  
15 preferred orientation, improve the quality of cryo-EM micrograph by forming the thin  
16 ice, and be applicable to solve the high-resolution structure of small proteins with the  
17 molecular weight lower to 48 kDa.

18

## 1 **Results**

### 2 **Preparation of cryo-EM grid covering by HFBI-film**

3 We expressed recombinant HFBI in *Pichia pastoris* and got the protein purified by  
4 ultrafiltration and acetonitrile extraction (Extended Data Fig. 1a,b) according to our  
5 previous study<sup>35</sup>. Consistently, we found that HFBI can self-assemble into the well-  
6 ordered nanolayer (HFBI-film) with a thickness of 2 nm (Extended Data Fig. 1c,d). We  
7 also found HFBI nanolayer can alter the hydrophobic surface of siliconized glass to  
8 hydrophilic (Extended Data Fig. 1e,f) and alter the hydrophilic surface of mica to  
9 hydrophobic (Extended Data Fig. 1g,h) according to the water contact angle  
10 measurement, suggesting an amphipathic property of the HFBI-film (Fig. 1a).

11 We transferred the HFBI-film to a holey amorphous nickel titanium alloy (NiTi)  
12 foil grid<sup>12</sup>. After the visible and large HFBI-film spontaneously formed on the top of a  
13 solution drop, we incubated the NiTi foil grid on the top of the drop with the NiTi foil  
14 contacting the hydrophobic side of the HFBI-film, resulting the transfer of HFBI-film  
15 onto the grid (Fig. 1b). Since another exposed side of the HFBI-film is hydrophilic (Fig.  
16 1c), the conventional grid treatments by plasma cleaning or ultraviolet (UV) irradiation  
17 before cryo-vitrification were not necessary for the HFBI-film. We then examined the  
18 integrity of HFBI-film by using cryo-scanning electron microscopy (cryo-SEM) and  
19 found that most area of the holey NiTi foil was covered by the HFBI-film uniformly  
20 and completely (Fig. 1d). In the subsequent cryo-EM experiment, we found that the  
21 HFBI-film had almost invisible background (Fig. 1e) with the power spectrum showing

1 the first diffraction lattice spots around 23.4 Å (Fig. 1f). We then performed further  
2 image processing using the *2dx* software package<sup>36</sup> and found that the lattice of the 2D  
3 crystal HFBI-film (Fig. 1g) is hexagonal with the symmetry of p3, which is in  
4 consistency with the previous study by atomic force electron microscopy<sup>37</sup>.

#### 5 **HFBI-film allows thin enough ice and well-distributed particles**

6 We first selected human apoferritin as the typical sample to explore the suitability of  
7 the HFBI-film for cryo-EM single particle analysis. We performed conventional cryo-  
8 vitrification procedure using FEI Vitrobot Mark IV by optimizing the parameter of  
9 blotting force and time. We found that, in comparison with the conventional cryo-EM  
10 grid, the grid covering the HFBI-film can enable a uniform much thinner ice containing  
11 apoferritin particles (Fig. 2a,b). We took serials of electron micrographs using various  
12 defocuses from -1.92 μm to -0.48 μm (Extended Data Fig. 2) and found that the  
13 apoferritin particles showed a nice contrast even at a small defocus value of -0.48 μm  
14 (Fig. 2a), implying that the ice was thin enough. We also found that the apoferritin  
15 particles showed a uniform dispersed and low-aggregated distribution, suggesting a  
16 high quality of cryo-vitrified specimen. Our subsequent cryo-electron tomographic  
17 reconstruction indicated that almost the particles within the ice formed a single thin  
18 layer and adsorbed onto the HFBI-film, avoiding the air-water interface contact  
19 (Extended Data Fig. 3).

20 Using this HFBI-film covered cryo-EM grid, we collected the cryo-EM dataset of  
21 human apoferritin by using FEI Talos Arctica operated in 200 kV and equipped with

1 GATAN BioQuantum K2 camera (Extended Data Table 1). After several steps of single  
2 particle analysis (Extended Data Fig. 4a,b), we obtained the final 3D cryo-EM map of  
3 human apoferritin (Fig. 2c) at an average resolution of 1.96-Å (Extended Data Fig. 4c)  
4 according to the gold standard Fourier Shell Correlation threshold  $FSC_{0.143}$  (Extended  
5 Data Fig. 4d). At the resolution of 1.96-Å, we could clearly see the holes in aromatic  
6 residues such as phenylalanine and tyrosine (Fig. 2d). We further performed density  
7 modification<sup>38</sup> to improve the quality of the map (Fig. 2e), which is comparable to the  
8 recently reported cryo-EM map of apoferritin at a resolution of 1.75-Å, the highest  
9 resolution reached by using 200 kV cryo-electron microscope<sup>39</sup>. To our best knowledge,  
10 our work presented the highest resolution of cryo-EM single particle analysis that used  
11 the continuous thin support film covered grids, including the graphene monolayer  
12 covered grids<sup>16,18</sup>.

13 We estimated the Rosenthal-Henderson B-factor<sup>40</sup> of this dataset as 87.8 Å<sup>2</sup> (Fig.  
14 2f), suggesting that we could only use 200~400 particles of this dataset to reach sub-3  
15 Å resolution. We noted that the B-factor of the 1.75-Å apoferritin map is 90.7 Å<sup>239</sup>. We  
16 believe it was the thin enough ice of the cryo-vitrified specimen to yield the high quality  
17 of the dataset with the small B-factor. We further analyzed the apoferritin particle  
18 orientation distribution in our dataset and found an even distribution (Extended Data  
19 Fig. 4e) with the calculated cryo-FE<sup>41</sup> value of 0.86 (Fig. 2g), which is much better than  
20 that of the previously reported apoferritin cryo-EM dataset using the graphene  
21 monolayer covered grids<sup>16</sup>.



## 1 **HFBI-film solves the strong preferred orientation of catalase**

2 It has been shown that the air-water interface using the conventional cryo-EM grid  
3 would induce 90% particles attaching to the air-water interface, resulting a significant  
4 preferential orientation of particles in many cases<sup>42</sup>. Our above study of the HFBI-film  
5 using the human apoferritin gave the insight that the HFBI-film could protect the  
6 protein particles away from the air-water interface and thus avoid the potential  
7 preferential orientation of particles. We then selected catalase as another typical sample  
8 to prove (Extended Data Table 1).

9 Using the conventional cryo-EM sample preparation protocol, catalase exhibited a  
10 strong preferred orientation with its side view<sup>43</sup> (see also Fig. 3a,b), which has  
11 forbidden us to use cryo-EM single particle analysis to solve the high-resolution  
12 structure of catalase. However, after cryo-vitrification of catalase using the HFBI-film  
13 covered NiTi foil grid, we observed a uniform distribution of catalase particles with  
14 various views, which was further assessed by 2D classification (Fig. 3c,d). After several  
15 steps of single particle analysis (Extended Data Fig. 5a), we obtained the cryo-EM map  
16 of catalase at the resolution of 2.28-Å (Fig. 3e,f and Extended Data Fig. 5b) according  
17 to the gold standard threshold  $FSC_{0.143}$  (Extended Data Fig. 5c). This is the first time  
18 for us to resolve the near atomic resolution structure of catalase using cryo-EM single  
19 particle analysis approach.

20 We further analyzed the particle orientation distribution in the dataset using the  
21 HFBI-film and observed an even distribution of catalase particles (Extended Data Fig.

1 5f) with the calculated cryo-EF value of 0.80 (Fig. 3d and Extended Data Fig. 5e),  
2 which is significantly improved in comparison with the cryo-EF value of 0.28 in the  
3 dataset using the NiTi foil grid only (Fig. 3b). We noted that the cryo-EF value of the  
4 previous study using the holey pure gold foil grid was reported as 0.2<sup>43</sup>. As a result, the  
5 HBFI-film can solve the preferred orientation problem by preventing particles from  
6 interacting with the air-water interface, thus enabling structure determination to the  
7 near-atomic resolution.

8 In addition, similar to the above study of human apoferritin, since the thickness of  
9 the ice could be thin enough by using the HFBI-film, we could collect a high quality of  
10 cryo-EM dataset of catalase with a small Rosenthal-Henderson B-factor of 79.3 Å<sup>2</sup>  
11 (Extended Data Fig. 5d).

## 12 **pH regulated particle orientation distribution on HFBI-film**

13 Considering the hydrophilic nature of the exposed side of HFBI-film, we believe the  
14 protein particles are adsorbed mainly by electrostatic interaction<sup>44</sup>. To prove this  
15 hypothesis, we selected glutamate dehydrogenase (GDH) as a third typical sample to  
16 study its orientation distribution in the cryo-vitrified sample using the HFBI-film and  
17 study whether such distribution could be regulated by the pH value (Extended Data  
18 Table 1).

19 We found that the orientation distributions of GDH were obviously different upon  
20 different pH conditions (Fig. 4a and Extended Data Fig. 6). In the acidic condition GDH  
21 particles majorly showed top and oblique views, while in the basic condition GDH

1 mainly showed side views (Fig. 4b). We collected a large cryo-EM dataset of GDH at  
2 the pH value of 7.5, which is close to its isoelectric point (pH 7.66). At this pH condition,  
3 GDH particles exhibited a most even distribution. After several steps of single particle  
4 analysis (Extended Data Fig. 7a), we obtained the cryo-EM map of GDH at the  
5 resolution of 2.28-Å (Fig. 4c and Extended Data Fig. 7c) according to the gold standard  
6 threshold  $FSC_{0.143}$  (Extended Data Fig. 7d). The cryo-EF analysis of this dataset gave  
7 the factor of 0.84 (Extended Data Fig. 7e) and indicated there is no preferred orientation  
8 issue (Extended Data Fig. 7f). We also calculated the Rosenthal-Henderson B-factor of  
9 this dataset as 76.0 Å<sup>2</sup> (Extended Data Fig. 7g), again suggesting a high quality of cryo-  
10 EM dataset.

11 As a result, although the HFBI-film could raise a new preferential orientation  
12 distribution like other thin continuous support films, e.g. graphene or ultra-thin carbon  
13 film, the particular electrostatic adsorption mechanism of the HFBI-film could allow us  
14 to optimize the distribution of particles by adjusting the pH value. In principle, we  
15 believe, the pH value could be optimized to the isoelectric point of the target protein.

### 16 **Application of HFBI-film for small protein particles**

17 To further explore the potential of our HFBI-film for cryo-EM experiments of small  
18 proteins (<200 kDa), we selected aldolase (150 kDa, homo-tetramer) and hemoglobin  
19 (64 kDa, hetero-tetramer  $\alpha\beta\alpha\beta$ ) as the test samples (Extended Data Table 1).

20 With the thin enough ice using the HFBI-film, we could clearly visualize the  
21 particles of aldolase and hemoglobin from raw electron micrographs (Fig. 5a,d) and

1 could observe the secondary elements directly from the 2D classifications (Extended  
2 Data Fig. 8b,10b). After several steps of single particle analysis (Extended Data Fig.  
3 8a), we obtained the cryo-EM map of aldolase at the resolution of 3.34-Å (Fig. 5b,c and  
4 Extended Data Fig. 8c) according to the gold standard threshold  $FSC_{0.143}$  (Extended  
5 Data Fig. 8d). We did not observe any preferential orientation with the computed cryo-  
6 EF value of 0.84 (Extended Data Fig. 8e,f). We found that the calculated Rosenthal-  
7 Henderson B-factor ( $156.3 \text{ \AA}^2$ , Extended Data Fig. 8g) of the cryo-EM dataset of  
8 aldolase was double larger than those of the above studies for apoferritin, catalase and  
9 GDH.

10 The increased Rosenthal-Henderson B-factor of aldolase dataset would be due to  
11 the background of the HFBI-film. Therefore, to process the cryo-EM dataset of  
12 hemoglobin with the molecular weight of 64 kDa, we began to consider the significant  
13 influence of this factor. The signal of the 2D crystal HFBI-film could be simply  
14 removed using a lattice filtering algorithm in Fourier space<sup>45,46</sup> (Extended Data Fig. 9).  
15 Starting from the background extracted dataset, after several steps of single particle  
16 analysis (Extended Data Fig. 10a), we obtained the cryo-EM map of hemoglobin at the  
17 resolution of 3.6-Å (Fig. 5e,f and Extended Data Fig. 10c) according to the gold  
18 standard threshold  $FSC_{0.143}$  (Extended Data Fig. 10d). No orientation bias was found  
19 with the cryo-EF values of 0.86 (Extended Data Fig. 10e,f). The calculated Rosenthal-  
20 Henderson B-factor ( $162.2 \text{ \AA}^2$ , Extended Data Fig. 10g) was again double larger than  
21 those of the above studies for apoferritin, catalase and GDH.

1        We further explored whether our HFBI-film could be suitable for even smaller  
2 proteins. Utilizing a similar approach of the previous study<sup>17</sup>, starting from the raw  
3 dataset of 64 kDa hemoglobin particles, we performed *in silico* substation (Extended  
4 Data Fig. 11) to generate two datasets of smaller particles, one for a heterodimer ( $\alpha\beta$   
5 subunit, 32 kDa), and another for a heterotrimer ( $\alpha\beta\alpha$  subunit, 48 kDa). For each dataset,  
6 we performed the reference-free 2D classification and the 2D classification with pre-  
7 aligned angular information (Extended Data Fig. 11a). For the dataset of the  
8 heterotrimer, we found that the reference-free classification with the global alignment  
9 could still yield good class averages with the secondary structural details. However, for  
10 the dataset of the heterodimer, we observed many classes with mis-aligned particles,  
11 comparing to the classification using the prior alignment. Consistently, our subsequent  
12 3D reconstructions by performing angular global search from scratch also showed that  
13 the 48 kDa heterotrimer could be resolved successfully to a high resolution of 3.8-Å  
14 while the 32 kDa heterodimer could only be resolved to a low resolution of 6.4-Å  
15 (Extended Data Fig. 11b,c), suggesting the signal-to-noise ratio of the 32 kDa  
16 heterodimer particles at the current dataset was not enough for precise particle  
17 alignment.

18        As a result, our above studies proved that the HFBI-film could be applied to study  
19 the high resolution cryo-EM structures of small proteins with the molecular weight  
20 lower to 48 kDa.

## 1 **Discussion**

2 In the present study, we developed a new type of cryo-EM grid by coating 2D crystal  
3 of HFBI protein onto the holey amorphous NiTi foil grid and evaluated this kind of grid  
4 to solve the air-water interface problem, which has been recognized as the major factor  
5 to induce denaturation/aggregation and preferred orientation of protein particles during  
6 the conventional vitrification procedure and prevent the high resolution study of cryo-  
7 EM

8 The amphipathic property of the HFBI-film allows it easy to coat onto the holey  
9 amorphous NiTi foil using its hydrophobic side and leave its hydrophilic side exposed  
10 ready to adsorb the protein particles via electrostatic interactions. Thus, unlike other  
11 cryo-EM grids, pre-treatment such as plasma cleaning or UV irradiation before cryo-  
12 vitrification is not necessary. The adsorption of protein particles by the HFBI-film not  
13 only protects the specimen away from the air-water interface but also allows the  
14 thickness of the ice thin enough, which is important to increase the quality of the cryo-  
15 EM images, which has been proved by the small Rosenthal-Henderson B-factor in our  
16 experiments. With the HFBI-film, we for the first time determined the high resolution  
17 cryo-EM structure of catalase, which showed a severe air-water interface induced  
18 preferential orientation using the conventional cryo-vitrification protocol.

19 Although the preferential orientation issue also exists by using HFBI-film, the  
20 orientation distribution of protein particles can be optimized by adjusting the pH of the  
21 buffer to regulate the interaction between the specimen and the HFBI-film. We

1 speculated that the optimal pH could be selected close to the isoelectric point of the  
2 target protein. Thus, the potential preferential orientation issue by using HFBI-film can  
3 be easily solved by adjusting the pH value, which has been proved by our experiments  
4 using GDH as a test sample.

5 The thickness of the HFBI-film is 2 nm, which is thin enough to keep a low  
6 background for most cryo-EM experiments. In our present study, we proved that a  
7 standard image processing procedure was enough for those particles with the molecular  
8 weight higher than 150 kDa. With the lower molecular weight, the Rosenthal-  
9 Henderson B-factor increased and the achievable resolution decreased (Extended Data  
10 Fig. 12). For those protein particles with the molecular weight lower than 100 kDa,  
11 additional background removing procedure would be important for high resolution  
12 reconstruction. Since the HFBI-film is the 2D crystal, its lattice background can be  
13 easily removed by Fourier filtering algorithm without damaging the quality of the data.  
14 We proved that with this procedure the structure of human hemoglobin (64 kDa) can  
15 be successfully solved to 3.6-Å. By additional *in silico* experiments, we further showed  
16 that at least a protein particle with the molecular weight of 48 kDa could be solved to  
17 the high resolution by using our HFBI-film.

18 Compared to other types of continuous support films such as graphene and 2D  
19 crystal of streptavidin, the production of our HFBI-film is simple and efficient, the pre-  
20 treatment before cryo-vitrification is not needed, the background is low and suitable for  
21 small particles, and the particle adsorption mechanism is new via electrostatic

1 interactions, allowing regulating particle orientation distribution simply by changing  
2 the pH value. Thus, the use of our HFBI-film is an economic and highly efficient  
3 solution with a high successful rate to solve the air-water interface challenge.

4 Overall, our present work proves a new type of continuous support film coated grid  
5 that would have a wide application in the future cryo-EM studies.

## 6 **References**

- 7 1. Cheng, Y., Glaeser, R.M. & Nogales, E. How Cryo-EM Became so Hot. *Cell* **171**, 1229-  
8 1231 (2017).
- 9 2. Yip, K.M., Fischer, N., Paknia, E., Chari, A. & Stark, H. Atomic-resolution protein  
10 structure determination by cryo-EM. *Nature* **587**, 157-161 (2020).
- 11 3. Nakane, T. et al. Single-particle cryo-EM at atomic resolution. *Nature* **587**, 152-156  
12 (2020).
- 13 4. Glaeser, R.M. How good can cryo-EM become? *Nature methods* **13**, 28-32 (2016).
- 14 5. Glaeser, R.M. et al. Factors that Influence the Formation and Stability of Thin, Cryo-  
15 EM Specimens. *Biophys J* **110**, 749-755 (2016).
- 16 6. Drulyte, I. et al. Approaches to altering particle distributions in cryo-electron  
17 microscopy sample preparation. *Acta Crystallogr D Struct Biol* **74**, 560-571 (2018).
- 18 7. Snijder, J. et al. Vitriification after multiple rounds of sample application and blotting  
19 improves particle density on cryo-electron microscopy grids. *Journal of structural*  
20 *biology* **198**, 38-42 (2017).
- 21 8. Isabell, T.C., Fischione, P.E., O'Keefe, C., Guruz, M.U. & Dravid, V.P. Plasma Cleaning  
22 and Its Applications for Electron Microscopy. *Microsc Microanal* **5**, 126-135 (1999).
- 23 9. Meyerson, J.R. et al. Self-assembled monolayers improve protein distribution on holey  
24 carbon cryo-EM supports. *Scientific reports* **4**, 7084 (2014).
- 25 10. Russo, C.J. & Passmore, L.A. Electron microscopy: Ultrastable gold substrates for  
26 electron cryomicroscopy. *Science* **346**, 1377-1380 (2014).
- 27 11. Naydenova, K., Jia, P. & Russo, C.J. Cryo-EM with sub-1 Å specimen movement.  
28 *Science (New York, N.Y)* **370**, 223-226 (2020).
- 29 12. Huang, X. et al. Amorphous nickel titanium alloy film: A new choice for cryo electron  
30 microscopy sample preparation. *Progress in biophysics and molecular biology* **156**, 3-  
31 13 (2020).
- 32 13. Grassucci, R.A., Taylor, D.J. & Frank, J. Preparation of macromolecular complexes for  
33 cryo-electron microscopy. *Nature Protocols* **2**, 3239-3246 (2007).
- 34 14. Russo, C.J. & Passmore, L.A. Controlling protein adsorption on graphene for cryo-EM  
35 using low-energy hydrogen plasmas. *Nature methods* **11**, 649-652 (2014).
- 36 15. Pantelic, R.S., Meyer, J.C., Kaiser, U. & Stahlberg, H. The application of graphene as



- 1 a sample support in transmission electron microscopy. *Solid State Communications* **152**,  
2 1375-1382 (2012).
- 3 16. Naydenova, K., Peet, M.J. & Russo, C.J. Multifunctional graphene supports for  
4 electron cryomicroscopy. *Proc Natl Acad Sci U S A* **116**, 11718-11724 (2019).
- 5 17. Fan, X. et al. Single particle cryo-EM reconstruction of 52 kDa streptavidin at 3.2  
6 Angstrom resolution. *Nat Commun* **10**, 2386 (2019).
- 7 18. Han, Y. et al. High-yield monolayer graphene grids for near-atomic resolution  
8 cryoelectron microscopy. *Proc Natl Acad Sci U S A* **117**, 1009-1014 (2020).
- 9 19. Pantelic, R.S., Meyer, J.C., Kaiser, U., Baumeister, W. & Plitzko, J.M. Graphene oxide:  
10 A substrate for optimizing preparations of frozen-hydrated samples. *Journal of*  
11 *Structural Biology* **170**, 152-156 (2010).
- 12 20. Palovcak, E. et al. A simple and robust procedure for preparing graphene-oxide cryo-  
13 EM grids. *Journal of Structural Biology* **204**, 80-84 (2018).
- 14 21. Han, B.G. et al. Long shelf-life streptavidin support-films suitable for electron  
15 microscopy of biological macromolecules. *Journal of Structural Biology* **195**, 238-244  
16 (2016).
- 17 22. Wang, L.G., Ounjai, P. & Sigworth, F.J. Streptavidin crystals as nanostructured  
18 supports and image-calibration references for cryo-EM data collection. *Journal of*  
19 *Structural Biology* **164**, 190-198 (2008).
- 20 23. Kershaw, M.J. & Talbot, N.J. Hydrophobins and repellents: Proteins with fundamental  
21 roles in fungal morphogenesis. *Fungal Genetics and Biology* **23**, 18-33 (1998).
- 22 24. Linder, M.B., Szilvay, G.R., Nakari-Setala, T. & Penttila, M.E. Hydrophobins: the  
23 protein-amphiphiles of filamentous fungi. *FEMS Microbiol Rev* **29**, 877-896 (2005).
- 24 25. Wosten, H.A. et al. How a fungus escapes the water to grow into the air. *Curr Biol* **9**,  
25 85-88 (1999).
- 26 26. Zhao, L. et al. Functional Modification of Fibrous PCL Scaffolds with Fusion Protein  
27 VEGF-HGFI Enhanced Cellularization and Vascularization. *Adv Healthc Mater* **5**,  
28 2376-2385 (2016).
- 29 27. Politi, J. et al. One-pot synthesis of a gold nanoparticle-Vmh2 hydrophobin  
30 nanobiocomplex for glucose monitoring. *Nanotechnology* **27**, 195701 (2016).
- 31 28. Duan, S.X. et al. Hydrophobin HGFI-based fibre-optic biosensor for detection of  
32 antigen-antibody interaction. *Nanophotonics-Berlin* **9**, 177-186 (2020).
- 33 29. Nakari-Setala, T. et al. Expression of a fungal hydrophobin in the *Saccharomyces*  
34 *cerevisiae* cell wall: Effect on cell surface properties and immobilization. *Appl Environ*  
35 *Microb* **68**, 3385-3391 (2002).
- 36 30. Linder, M.B. et al. Efficient purification of recombinant proteins using hydrophobins  
37 as tags in surfactant-based two-phase systems. *Biochemistry* **43**, 11873-11882 (2004).
- 38 31. Schuren, F.H. & Wessels, J.G. Two genes specifically expressed in fruiting dikaryons  
39 of *Schizophyllum commune*: homologies with a gene not regulated by mating-type  
40 genes. *Gene* **90**, 199-205 (1990).
- 41 32. Butko, P. et al. Spectroscopic evidence for amyloid-like interfacial self-assembly of  
42 hydrophobin Sc3. *Biochem Bioph Res Co* **280**, 212-215 (2001).
- 43 33. Kisko, K. et al. Self-Assembled Films of Hydrophobin Proteins HFBI and HFBI  
44 Studied in Situ at the Air/Water Interface. *Langmuir* **25**, 1612-1619 (2009).

- 1 34. Cox, A.R., Cagnol, F., Russell, A.B. & Izzard, M.J. Surface properties of class ii  
2 hydrophobins from *Trichoderma reesei* and influence on bubble stability. *Langmuir* **23**,  
3 7995-8002 (2007).
- 4 35. Niu, B., Wang, D., Yang, Y., Xu, H. & Qiao, M. Heterologous expression and  
5 characterization of the hydrophobin HFBI in *Pichia pastoris* and evaluation of its  
6 contribution to the food industry. *Amino Acids* **43**, 763-771 (2012).
- 7 36. Gipson, B., Zeng, X., Zhang, Z.Y. & Stahlberg, H. 2dx--user-friendly image processing  
8 for 2D crystals. *J Struct Biol* **157**, 64-72 (2007).
- 9 37. Szilvay, G.R. et al. Self-assembled hydrophobin protein films at the air-water interface:  
10 structural analysis and molecular engineering. *Biochemistry* **46**, 2345-2354 (2007).
- 11 38. Terwilliger, T.C., Ludtke, S.J., Read, R.J., Adams, P.D. & Afonine, P.V. Improvement  
12 of cryo-EM maps by density modification. *Nat Methods* **17**, 923-927 (2020).
- 13 39. Wu, M., Lander, G.C. & Herzik, M.A., Jr. Sub-2 Angstrom resolution structure  
14 determination using single-particle cryo-EM at 200keV. *J Struct Biol X* **4**, 100020  
15 (2020).
- 16 40. Rosenthal, P.B. & Henderson, R. Optimal determination of particle orientation,  
17 absolute hand, and contrast loss in single-particle electron cryomicroscopy. *J Mol Biol*  
18 **333**, 721-745 (2003).
- 19 41. Naydenova, K. & Russo, C.J. Measuring the effects of particle orientation to improve  
20 the efficiency of electron cryomicroscopy. *Nat Commun* **8**, 629 (2017).
- 21 42. Noble, A.J. et al. Routine single particle CryoEM sample and grid characterization by  
22 tomography. *Elife* **7** (2018).
- 23 43. Naydenova, K. et al. CryoEM at 100 keV: a demonstration and prospects. *IUCrJ* **6**,  
24 1086-1098 (2019).
- 25 44. Wang, Z., Lienemann, M., Qiao, M. & Linder, M.B. Mechanisms of protein adhesion  
26 on surface films of hydrophobin. *Langmuir* **26**, 8491-8496 (2010).
- 27 45. Han, B.G. et al. Electron microscopy of biotinylated protein complexes bound to  
28 streptavidin monolayer crystals. *J Struct Biol* **180**, 249-253 (2012).
- 29 46. Lahiri, I. et al. 3.1A structure of yeast RNA polymerase II elongation complex stalled  
30 at a cyclobutane pyrimidine dimer lesion solved using streptavidin affinity grids.  
31 *Journal of structural biology* **207**, 270-278 (2019).
- 32
- 33
- 34
- 35
- 36
- 37

## 1 Figures

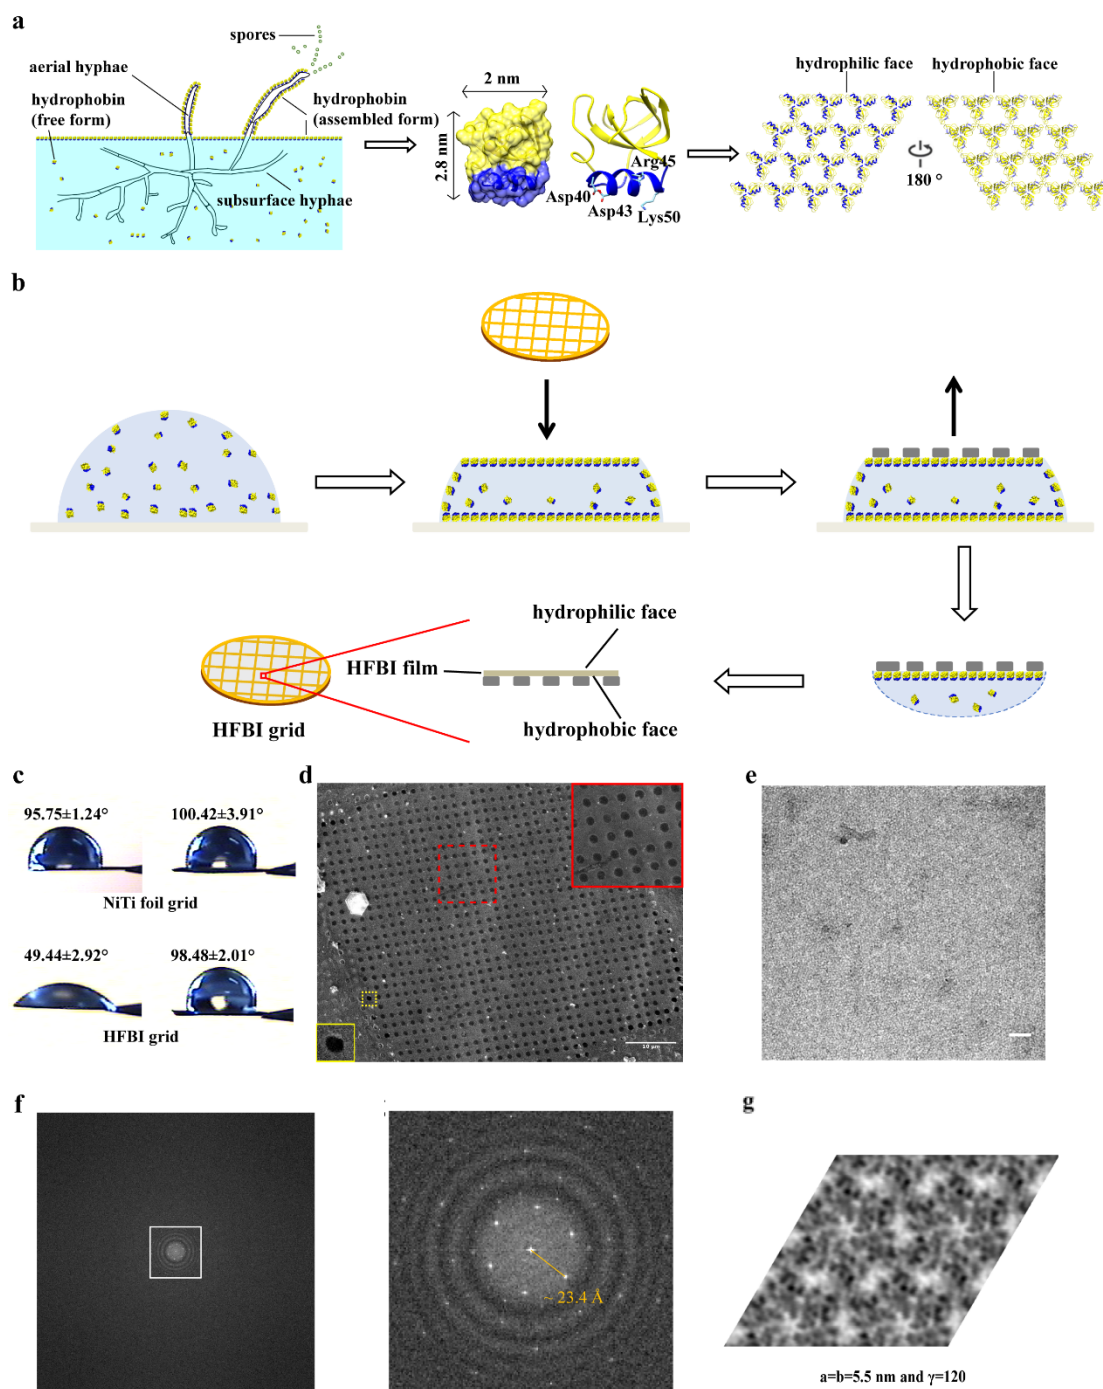

2

3 **Fig. 1 | Production and characterization of HFBI-film covered cryo-EM grid. a,**

4 The biological nature of hydrophobin I protein (HFBI) and its physiological role during

5 the filamentous fungal growth. HFBI is secreted as monomers and assemble into 2D

1 crystal film at the air-water interface, which coats the surfaces of aerial hyphae and  
2 spores and protects them from air-drying. **b**, The scheme of preparing HFBI-film  
3 covered cryo-EM grid. **c**, The water contact angles of NiTi foil grids without (upper)  
4 and with (bottom) HFBI-film coated were measured and labeled for both front (left)  
5 and back (right) sides. The HFBI-film was covered on the front side of the grid. No  
6 treatment of plasma cleaning was performed here. A drop of 3  $\mu\text{l}$  water was used in this  
7 measurement. **d**, Cryo-SEM image of the HFBI-film covered on a holey NiTi foil grid.  
8 Most holes are covered by the HFBI-film. The regions in dotted squares are zoomed in  
9 at the insets, respectively. The region in the red square is completely covered by the  
10 HFBI-film and that in the yellow square contains an empty hole without the HFBI-  
11 film. Scale bar, 10  $\mu\text{m}$ . **e**, The representative cryo-EM micrograph of the HFBI film.  
12 Scale bar, 20 nm. **f**, Power spectrum of the representative cryo-EM micrograph,  
13 showing the typical diffraction pattern of the HFBI 2D crystal with the first diffraction  
14 lattice spots around 23.4  $\text{\AA}$ . **g**, Imaging processing with unbending and Fourier  
15 extraction using 2dx package yields the arrangement of HFBI-film as the symmetry of  
16  $p3$ . The unit cell parameter is labeled.

17

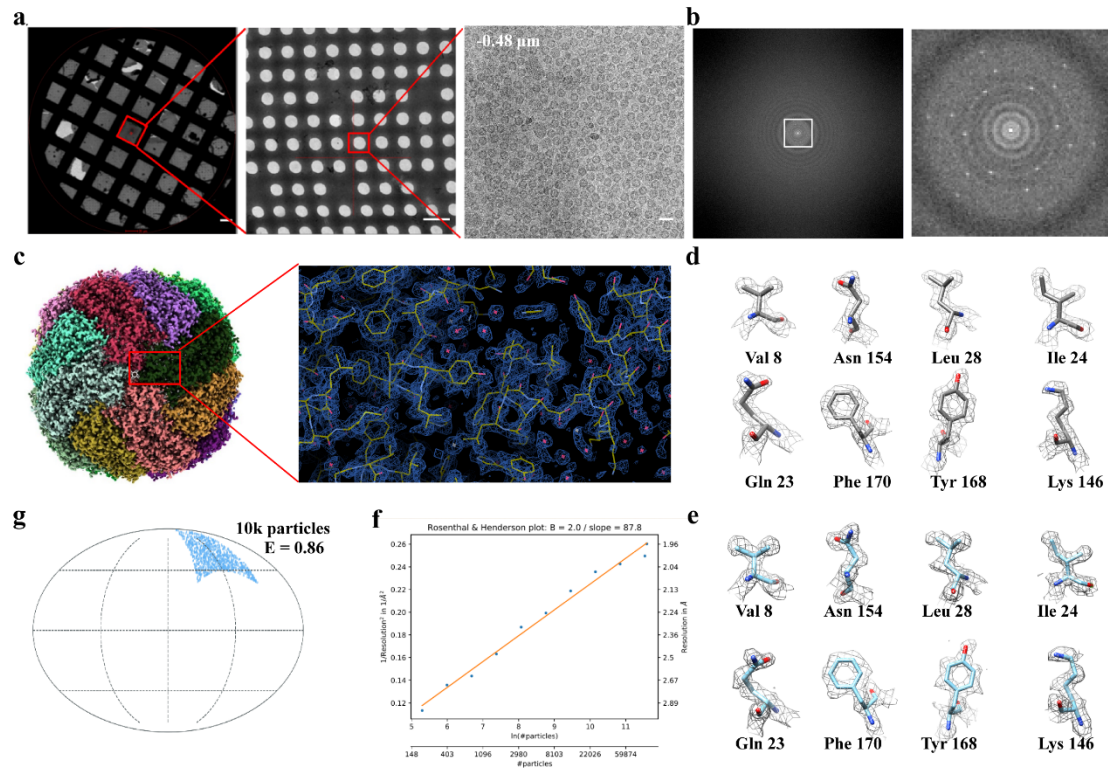

1

2 **Fig. 2 | Cryo-EM application of HFBI-film using human apoferritin as a test**

3 **sample. a**, Cryo-EM micrographs of cryo-vitrified grid in different magnifications

4 showing uniform and thin vitrified ice as well as the uniform distribution of apoferritin

5 particles, respectively. The defocus value of the micrograph in high magnification (right)

6 is labeled. Scale bar, from left to right, 20  $\mu\text{m}$ , 2  $\mu\text{m}$ , 20 nm. **b**, Power spectrum (left)

7 of the high magnification cryo-EM micrograph in **a**. The central region is zoomed in

8 (right) showing the diffraction spots of 2D crystal of HFBI-film. **c**, Cryo-EM map of

9 the human apoferritin at 1.96-Å resolution and its representative region is zoomed in

10 (right) with atomic model fitted. **d**, Representative electron densities of selected amino

11 acid residues. **e**, Representative electron densities of selected amino acid residues after

12 density modification. **f**, Rosenthal-Henderson plot with the estimated B-factor of 87.8

13 Å. **g**, The orientation distribution of apoferritin particles with the cryo-EF value of 0.86

14 calculated using 10,000 particles.

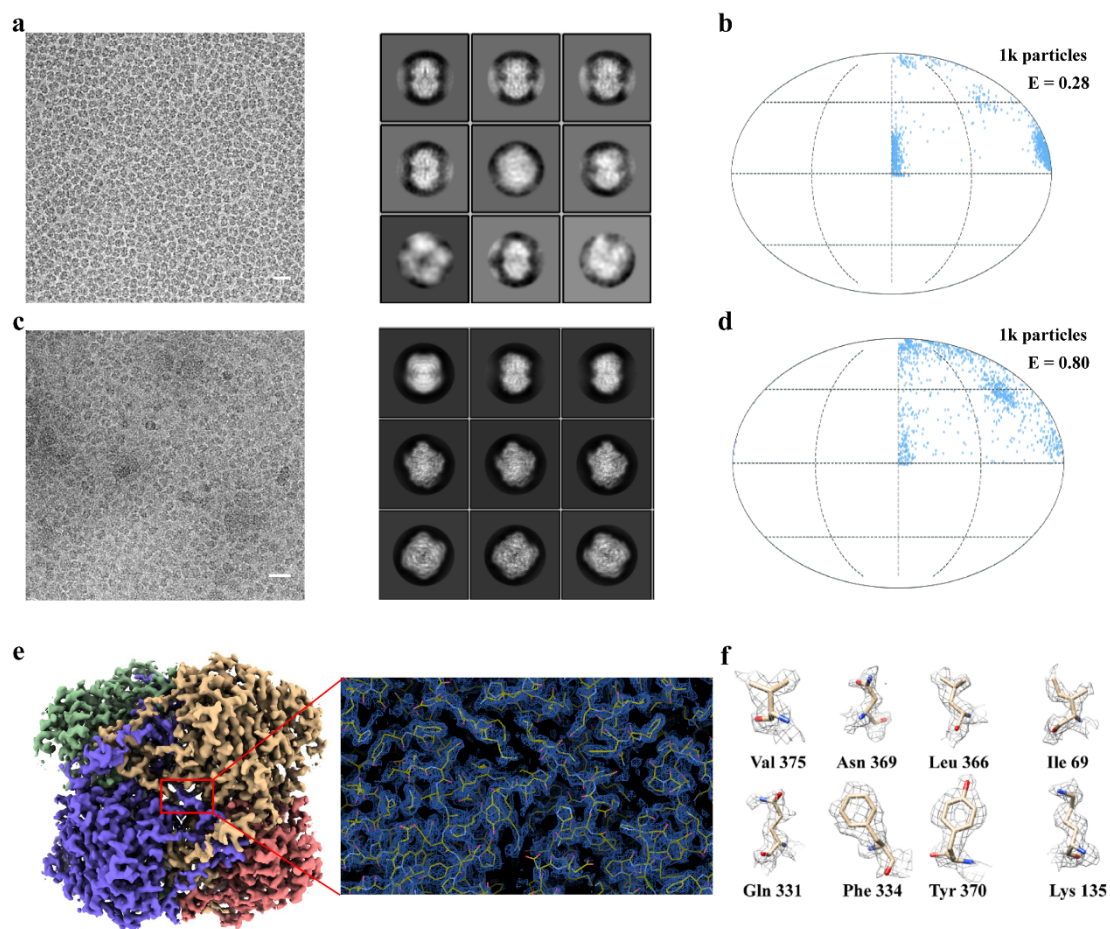

1

2 **Fig. 3 | Using HFBI-film to solve the preferred orientation problem. a,** A

3 representative cryo-EM micrograph of catalase using a holey NiTi foil grid (scale bar,

4 20 nm) and the representative 2D class averages. **b,** The orientation distribution of

5 catalase particles with the cryo-EF value of 0.28 calculated using 1,000 particles in the

6 dataset of **a**. **c,** A representative cryo-EM micrograph of catalase using HFBI-film

7 covered NiTi foil grid (scale bar, 20 nm.) and the representative 2D class averages. **d,**

8 The orientation distribution of catalase particles with the cryo-EF value of 0.80

9 calculated using 1,000 particles in the dataset of **b**. **e,** Cryo-EM map of the catalase at

10 2.28-Å resolution and its representative region is zoomed in (right) with atomic model

11 fitted. **f,** Representative electron densities of selected amino acid residues.

12

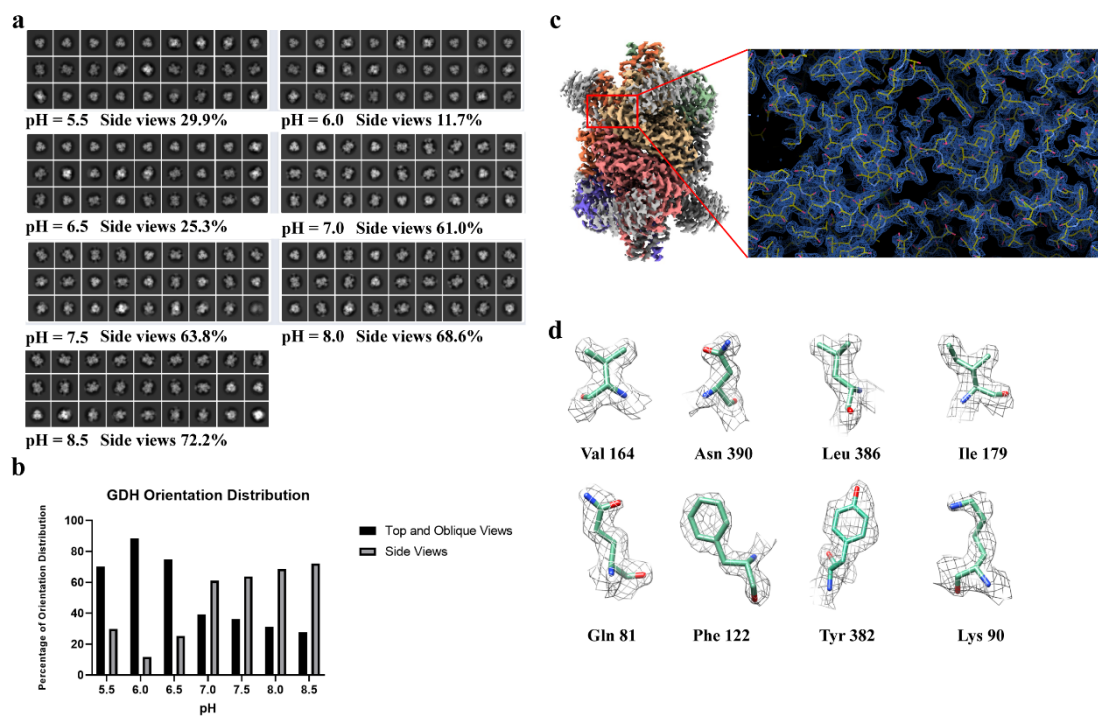

1

2 **Fig. 4 | Regulating particle orientation distribution by adjusting the pH. a,**

3 Representative 2D class averages of GDH in different pH values using the HFBI-film

4 covered grid. The percentages of side views of GDH were counted and labeled

5 accordingly. **b,** The statistics of percentages of different GDH views at different pH

6 values. **c,** Cryo-EM map of GDH in pH 7.5 was solved to 2.28-Å resolution and its

7 representative region is zoomed in (right) with atomic model fitted. **d,** Representative

8 electron densities of selected amino acid residues.

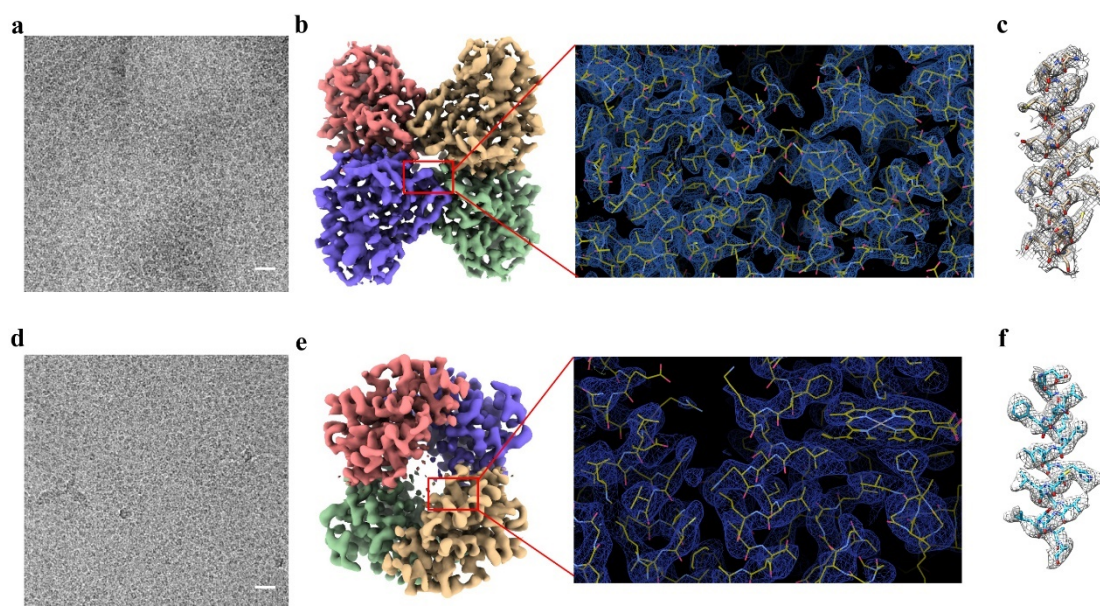

1

2 **Fig. 5 | Applying HFBI-film to small proteins. a,** The representative cryo-EM

3 micrograph of aldolase. Scale bar, 20 nm. **b,** Cryo-EM map of the aldolase at 3.34-Å

4 resolution and its representative region is zoomed in (right) with the atomic model fitted.

5 **c,** Representative map of one helix of the aldolase with the atomic model fitted. **d,** The

6 representative cryo-EM micrograph of hemoglobin. Scale bar, 20 nm. **e,** Cryo-EM map

7 of the hemoglobin at 3.6-Å resolution and its representative region is zoomed in (right)

8 with the atomic model fitted. **f,** Representative map of one helix of the hemoglobin with

9 the atomic model fitted.

10

11

12

13

14



## 1 **Methods**

### 2 **Expression and Purification of Hydrophobin I protein**

3 Molecular cloning and recombinant expression of HFBI have been reported  
4 previously<sup>35</sup>. Briefly, positive transformants (His<sup>+</sup> Mut<sup>+</sup>) were chosen for flask  
5 cultivation and induced in buffered minimal methanol (BMM) medium with 0.7%  
6 methanol at 30 °C for 4 days. One strain with the highest production of HFBI was  
7 chosen for 96 h Fed-batch fermentation.

8 HFBI was purified by a two-step procedure including ultrafiltration and acetonitrile  
9 extraction. The expression supernatant containing HFBI was collected and purified by  
10 ultrafiltration using a hollow fiber membrane module (Tianjin MOTIMO Membrane  
11 Technology Ltd., China) and then lyophilized into powders. The powders were  
12 redissolved in 0.01% trifluoroacetic acid / 40% acetonitrile solution with a final  
13 concentration of 40 mg ml<sup>-1</sup>, stirring for 10 min prior to ultrasonic for 10 min. The crude  
14 extracted proteins were collected by the centrifugation with 8000 rpm for 30 min and  
15 then lyophilized into powders and stored for further study.

### 16 **Water contact angle (WCA) measurements**

17 Hydrophobic siliconized glass (HR3-239; Hampton Research) and hydrophilic mica  
18 sheets (J & K Chemical Technology, Tianjin, China) were used to study the properties  
19 of HFBI-film on solid surfaces. Each surface was coated with 50 µl of 100 µg ml<sup>-1</sup> HFBI  
20 solution and incubated at room temperature (25 °C) overnight, using uncoated  
21 substrates as controls. The surface was subsequently rinsed three times with Milli-Q

1 water to remove uncoated proteins and dried naturally. WCA was measured with a KSV  
2 Contact Angle Measurement System with a 5  $\mu\text{l}$  water droplet on the protein-coated  
3 side of the material. Three replicates were performed on different areas of the sample  
4 surface.

### 5 **Atomic force microscopy (AFM) measurements**

6 The freshly cleaved mica was coated with a 100  $\mu\text{l}$  droplet of purified HFBI protein  
7 solution (100  $\mu\text{g ml}^{-1}$ ) and incubated for 3 min at room temperature, rinsed three times  
8 with Milli-Q water to remove uncoated proteins and dried naturally. The topography of  
9 HFBI-coated mica surface was investigated by atomic force microscopy (AFM,  
10 Dimension Icon, Bruker, Frankfurt, America). The AFM parameters were set as follows,  
11 scan size of 5  $\mu\text{m}$ , scan rate of 1.95 Hz, resolution of 512 $\times$ 512 pixels, and aspect ratio  
12 of 1.0. The AFM images were processed using the NanoScope Analysis software 1.5.

### 13 **Preparation of HFBI-film covered grid**

14 The purified and lyophilized powder of HFBI protein was dissolved in milliQ water  
15 (pH 7) with a concentration of 3.6  $\text{mg ml}^{-1}$ , followed by sonication for about 1min to  
16 prevent from forming aggregation. Then the solution was further diluted to the working  
17 concentration of 100  $\mu\text{g ml}^{-1}$ , followed by additional sonication. A 30  $\mu\text{l}$  drop of the  
18 working solution was added onto the surface of parafilm that was placed in a closed  
19 cell-culture dish and incubated for  $\sim$  3 h in a humidified environment at room  
20 temperature and atmospheric pressure. When a visible film formed on the top of the  
21 drop, we transferred the film to a 300-mesh amorphous NiTi foil 1.2/1.3 Au grid

1 (Zhenjiang Lehua Electronic Technology, China) by incubating the grid on top of the  
2 drop for 15 min with the NiTi foil film in contact with the HFBI-film (Fig. 2b). After  
3 the transfer, a 5  $\mu$ l drop of milliQ water was added twice on the HFBI-film to clean off  
4 the impurities and a filter paper was used to draw remaining water away from the grid.  
5 Then the grid was left to dry in a grid holder at room temperature for the subsequent  
6 cryo-EM experiments.

### 7 **Preparation of tested sample and cryo-vitrification**

8 The human apoferritin was provided by Prof. K.L. Fan and Prof. X.Y. Yan's lab  
9 (Institute of Biophysics, CAS) and diluted to a concentration of 2 mg ml<sup>-1</sup> in the buffer  
10 containing 20 mM Tris-HCl and 150 mM NaCl (pH 6.5). The catalase from human  
11 erythrocytes, GDH, lyophilized rabbit muscle aldolase and lyophilized human  
12 hemoglobin were purchased from Sigma Aldrich. The catalase was diluted to a final  
13 concentration of 2.3 mg ml<sup>-1</sup> in the buffer of PBS (pH 6.5). The GDH was diluted to a  
14 final concentration of 3 mg ml<sup>-1</sup> and exchanged into the buffer of PBS (pH 7.5) by ultra-  
15 filtration. Lyophilized rabbit muscle aldolase was solubilized in the buffer of 20mM  
16 HEPES pH 7.5, 50 mM NaCl to a final concentration of 1.2 mg ml<sup>-1</sup>. Lyophilized human  
17 hemoglobin was solubilized in the buffer of PBS (pH 7.5) to a final concentration of  
18 6.3 mg ml<sup>-1</sup>. All these specimens were used directly for the subsequent cryo-vitrification  
19 without further treatments.

20 Using Vitrobot Mark IV (ThermoFisher Scientific, USA), 3.0  $\mu$ l aliquots of the  
21 sample were applied to the normal NiTi grid or the HFBI-film coated grid at 4 °C and

1 100 % humidity. After waiting for 2 min, the grid was blotted for about 4 s and rapidly  
2 plunged into the liquid ethane for cryo-vitrification.

### 3 **Cryo-EM data collection**

4 The cryo-EM dataset of apoferritin was collected in an FEI Talos Arctica electron  
5 microscope (200 kV) equipped with an energy filter and direct electron detector (Gatan  
6 BioQuantum K2) operated at the super resolution mode (**Extended Data Table 1**). A  
7 total number of 2649 raw movie stacks were automatically collected using SerialEM<sup>47</sup>.  
8 Images were recorded by beam-image shift method<sup>48</sup> with a physical pixel size of 0.8  
9 Å. The total dose was  $50 \text{ e}^-/\text{Å}^2$  to generate 32-frame gain normalized stacks in TIFF  
10 format. The defocus range varied from  $-0.6 \mu\text{m}$  to  $-2 \mu\text{m}$ .

11 The dataset of catalase was collected in an FEI Titan Krios G2 electron microscope  
12 (300 kV) equipped with an energy filter and direct electron detector (Gatan  
13 BioQuantum K2) operated at the super resolution mode (**Extended Data Table 1**). For  
14 the dataset using the HFBI-film coated grids, a total number of 372 movies were  
15 automatically collected by SerialEM with a physical pixel size of  $0.82 \text{ Å}$ . For the dataset  
16 using the normal NiTi grids, a total number of 73 movies were automatically collected  
17 using SerialEM with a physical pixel size of  $0.82 \text{ Å}$ . To push high resolution, another  
18 large dataset using the HFBI-film coated grids was collected with 2842 movies and a  
19 physical pixel size of  $0.65 \text{ Å}$ . Images were recorded by beam-image shift method. The  
20 total dose was  $60 \text{ e}^-/\text{Å}^2$  to generate 40-frame gain normalized stacks in TIFF format.  
21 The defocus range varied from  $-0.6 \mu\text{m}$  to  $-1.6 \mu\text{m}$ .

1 The dataset of GDH was collected in an FEI Titan Krios G2 electron microscope  
2 (300 kV) equipped with an energy filter and direct electron detector (Gatan  
3 BioQuantum K2) operated at the super resolution mode (**Extended Data Table 1**). A  
4 total number of 1635 raw movie stacks were automatically collected by SerialEM.  
5 Images were recorded by beam-image shift method with a physical pixel size of 0.65  
6 Å. The total dose was  $60 \text{ e}^-/\text{Å}^2$  to generate 40-frame gain normalized stacks in TIFF  
7 format. The defocus range varied from  $-0.6 \text{ }\mu\text{m}$  to  $-1.6 \text{ }\mu\text{m}$ .

8 The dataset of aldolase was collected in an FEI Titan Krios G2 electron microscope  
9 (300 kV) equipped with an energy filter and direct electron detector (Gatan  
10 BioQuantum K2) operated at the super resolution mode (**Extended Data Table 1**). A  
11 total number of 2460 raw movie stacks were automatically collected by SerialEM.  
12 Images were recorded by beam-image shift method with a physical pixel size of 0.65  
13 Å. The total dose was  $70 \text{ e}^-/\text{Å}^2$  to generate 40-frame gain normalized stacks in TIFF  
14 format. The defocus range varied from  $-0.6 \text{ }\mu\text{m}$  to  $-1.6 \text{ }\mu\text{m}$ .

15 The dataset of human hemoglobin was collected in an FEI Talos Arctica electron  
16 microscope (200 kV) equipped with an energy filter and direct electron detector (Gatan  
17 BioQuantum K2) operated at the super resolution mode (**Extended Data Table 1**). A  
18 total number of 2766 raw movie stacks were automatically collected by SerialEM.  
19 Images were recorded by beam-image shift method with a physical pixel size of 0.65  
20 Å. The total dose was  $70 \text{ e}^-/\text{Å}^2$  to generate 45-frame gain normalized stacks in TIFF  
21 format. The defocus range varied from  $-0.6 \text{ }\mu\text{m}$  to  $-1.6 \text{ }\mu\text{m}$ .

## 1 **Cryo-EM data processing**

2 All movie stacks were subjected to beam-induced motion correction and dose-  
3 weighting using RELION3.1 with a 5 x 5 patch and a 2-fold binning<sup>49,50</sup>. Contrast  
4 transfer function parameters for each micrograph were estimated by Gctf1.06<sup>51</sup>. Protein  
5 particles from a small subset of micrographs were picked by Gautomatch (developed  
6 by Kai Zhang, <http://www.mrc-lmb.cam.ac.uk/kzhang/Gautomatch/>). These particles  
7 were subjected into multiple rounds of 2D classification to generate clean particles for  
8 the subsequent topaz training<sup>52</sup>. The topaz method was used for the automatic particle  
9 picking based on the deep-denoised micrographs<sup>53</sup>. In total, there were 351,565  
10 particles for the apoferritin, 653,922 particles for the catalase, 35,587 particles for the  
11 glutamate dehydrogenase, 769,925 particles for the aldolase and 874,836 particles for  
12 the hemoglobin picked, respectively. Then, subsequent multiple rounds of 2D  
13 classification and 3D classification of binned particles in RELION3.1 were performed  
14 to discard “junk” particles.

15 For the datasets of apoferritin, glutamate dehydrogenase, aldolase and catalase, 3D  
16 auto-refinement, CTF Refinement and Bayesian polishing were all performed in  
17 RELION3.1 using the standard procedure. RELION ’s local resolution estimation was  
18 used to calculate the local resolution map. Final maps were all post-processed in  
19 RELION for model building and refinement. Density modification of apoferritin cryo-  
20 EM map was performed in PHENIX (v1.19-4092)<sup>54</sup> using the module of  
21 ResolveCryoEM<sup>38</sup>.

1 For the dataset of hemoglobin, the stander processing procedures including 2D  
2 classification and 3D classification were first performed in RELION. Then, the  
3 background of the HFBI 2D crystal lattice was removed from the motion-corrected  
4 micrographs using a modified Fourier filtering scripts<sup>45,46</sup>. The particles were then re-  
5 centered and re-extracted from the cleaned micrographs in RELION with the original  
6 pixel size of 1.04 Å. The subsequent 3D auto-refinement with C2 symmetry and post-  
7 processing yielded a map with a global resolution of 4.25 Å. Then the refined particles  
8 were subjected to an additional 3D classification in the local search mode. 103,777  
9 good particles were selected and subjected to 3D auto-refinement with C2 symmetry  
10 enforced. The global resolution was improved to 4.0 Å. The particles were then  
11 subjected to Bayesian polishing, pushing the resolution to 3.9 Å. We then performed  
12 one round of random phase 3D classification<sup>55</sup> to further remove bad particles. The final  
13 58,828 good particles were subjected for further 3D auto-refinement and Bayesian  
14 polishing, pushing the resolution to 3.69 Å. Finally, we imported the RELION refined  
15 particles into M<sup>56</sup> and improved the final resolution to 3.6 Å for the subsequent model  
16 building and refinement. Here, M<sup>56</sup> was also used to calculate the local resolution map.

### 17 **Model fitting and refinement**

18 The atomic models of apoferritin (PDB code 7K3V), catalase (PDB code 1DGH),  
19 glutamate dehydrogenase (PDB code 5K12), aldolase (PDB code 6V20) and  
20 hemoglobin (PDB code 5NI1) were docked into the corresponding cryo-EM maps  
21 using UCSF-Chimera<sup>57</sup>. Then each model was manually adjusted in Coot<sup>58</sup> and refined

1 in real space using PHENIX<sup>54</sup> (**Extended Data Table 1**).

## 2 **Cryo electron tomography data acquisition and processing**

3 We collected cryo electron tomography dataset of the same apoferritin that was used  
4 for cryo-EM single particle data collection. Tilt series were collected from  $-54^\circ$  to  $54^\circ$   
5 with a  $3^\circ$  interval at  $\times 79,000$  magnification (EFTEM mode,  $1.7 \text{ \AA}$  pixel size) in an FEI  
6 Talos Arctica electron microscope (200 kV) equipped with an energy filter and direct  
7 electron detector (Gatan BioQuantum K2). For each tilt, the exposure time was set 1.0 s  
8 with 8 frames using a total dose of  $3.38 \text{ e}/\text{\AA}^2$  in electron counting mode. Each set of  
9 tilt series has a total dose of  $125 \text{ e}/\text{\AA}^2$ . Data acquisition was automatically performed  
10 using SerialEM<sup>47</sup>. The tilt series raw stacks were motion-corrected by MotionCor2<sup>59</sup>.  
11 The fiducial-free alignment and tomogram reconstruction were processed in  
12 EMAN2.3<sup>60</sup>. The final tomograms were generated with four-time binning (pixel size  
13  $8.4 \text{ \AA}$ ).

14

15



## 1 **Data availability**

2 The atomic coordinates and cryo-EM density maps of apoferritin, catalase, glutamate  
3 dehydrogenase, HA trimer, aldolase and haemoglobin have been deposited in the RCSB  
4 Protein Data Bank (PDB) with the accession codes 7VD8, 7VD9, 7VDA, 7VDF, 7VDC  
5 and 7VDE and in the Electron Microscopy Data Bank (EMDB) with the accession  
6 codes EMD-31910, EMD-31911, EMD-31912, EMD-31916, EMD-31913 and EMD-  
7 31915, respectively.

## 8 **Code availability**

9 The scripts used for Fourier filtering are available at the accompanying Mendeley data  
10 site <http://dx.doi.org/10.17632/k2g2p5z9x6.2>. We further modified the Fourier filtering  
11 scripts according to the HFBI crystal lattice parameters.

## 12 **References**

- 13 47. Mastronarde, D.N. Automated electron microscope tomography using robust  
14 prediction of specimen movements. *J Struct Biol* **152**, 36-51 (2005).
- 15 48. Wu, C., Huang, X., Cheng, J., Zhu, D. & Zhang, X. High-quality, high-throughput cryo-  
16 electron microscopy data collection via beam tilt and astigmatism-free beam-image  
17 shift. *J Struct Biol* **208**, 107396 (2019).
- 18 49. Zivanov, J., Nakane, T. & Scheres, S.H.W. Estimation of high-order aberrations and  
19 anisotropic magnification from cryo-EM data sets in RELION-3.1. *IUCrJ* **7**, 253-267  
20 (2020).
- 21 50. Scheres, S.H.W. RELION: Implementation of a Bayesian approach to cryo-EM  
22 structure determination. *Journal of Structural Biology* **180**, 519-530 (2012).
- 23 51. Zhang, K. Gctf: Real-time CTF determination and correction. *J Struct Biol* **193**, 1-12  
24 (2016).
- 25 52. Bepler, T. et al. Positive-unlabeled convolutional neural networks for particle picking  
26 in cryo-electron micrographs. *Nat Methods* **16**, 1153-1160 (2019).
- 27 53. Bepler, T., Kelley, K., Noble, A.J. & Berger, B. Topaz-Denoise: general deep denoising  
28 models for cryoEM and cryoET. *Nat Commun* **11**, 5208 (2020).
- 29 54. Adams, P.D. et al. PHENIX: a comprehensive Python-based system for

- 1 macromolecular structure solution. *Acta Crystallogr D Biol Crystallogr* **66**, 213-221  
2 (2010).
- 3 55. Gong, X. et al. Structural Insights into the Niemann-Pick C1 (NPC1)-Mediated  
4 Cholesterol Transfer and Ebola Infection. *Cell* **165**, 1467-1478 (2016).
- 5 56. Tegunov, D., Xue, L., Dienemann, C., Cramer, P. & Mahamid, J. Multi-particle cryo-  
6 EM refinement with M visualizes ribosome-antibiotic complex at 3.5 Å in cells. *Nat*  
7 *Methods* **18**, 186-193 (2021).
- 8 57. Pettersen, E.F. et al. UCSF Chimera--a visualization system for exploratory research  
9 and analysis. *J Comput Chem* **25**, 1605-1612 (2004).
- 10 58. Emsley, P., Lohkamp, B., Scott, W.G. & Cowtan, K. Features and development of Coot.  
11 *Acta Crystallogr D Biol Crystallogr* **66**, 486-501 (2010).
- 12 59. Zheng, S.Q. et al. MotionCor2: anisotropic correction of beam-induced motion for  
13 improved cryo-electron microscopy. *Nature methods* **14**, 331-332 (2017).
- 14 60. Chen, M. et al. A complete data processing workflow for cryo-ET and subtomogram  
15 averaging. *Nat Methods* **16**, 1161-1168 (2019).

16 **Acknowledgements** We are grateful to Ping Shan, Ruigang Su and Mengyue Lou (F.S.  
17 lab) for their assistance in the lab management. All the sample preparation and cryo-  
18 EM works were performed at Center for Biological Imaging (CBI, <http://cbi.ibp.ac.cn>),  
19 Institute of Biophysics, Chinese Academy of Sciences. We would like to thank B.Z,  
20 X.H., X.L., T.N. and L.C. from CBI for their help with the cryo-EM data collection. We  
21 would be grateful to X.J. from CBI for her help in cryo-SEM experiments. This work  
22 was equally supported by grants from the Ministry of Science and Technology of China  
23 (2017YFA0504700), National Natural Science Foundation of China (31830020), and  
24 Chinese Academy of Sciences (XDB37040102). The authors would also like to thank  
25 the grant supports from National Natural Science Foundation of China for  
26 Distinguished Young Scholars (31925026), from Beijing Municipal Science and  
27 Technology Commission (Z181100004218002) and the Sino-Swiss scientific and  
28 technological cooperation project by the Ministry of Science and Technology of China  
29 (2015DFG32140).

1    **Author contributions** F.S. initiated the project. F.S. and M.Q supervised the project.  
2    H.F. designed and performed the production of HFBI-film covered grids. B.W.  
3    expressed, purified and characterized HFBI proteins. H.F. performed all the cryo-EM  
4    sample preparation, data collection, imaging processing and model building. H.F., F.S.,  
5    Yan Z., Yun Z. and Yujia Z. analyzed the data. H.F. and F.S. wrote the manuscript with  
6    additional input from B.W. and M.Q..

7    **Competing interests** Parts of this study (the production of HFBI-film covered grid)  
8    has been submitted as a Chinese patent of invention with the application number of  
9    202110576212.4 and is currently under scrutiny.

10   **Correspondence and requests for materials** should be addressed to F.S. or M.Q.

11

1 **Extended Data Table 1. Statistics of cryo-EM data collection and processing, and**  
 2 **model building, refinement and validation**

| <b>Protein</b>                                        | Apoferritin     | Catalase               | GDH             | Aldolase        | Hemoglobin      |
|-------------------------------------------------------|-----------------|------------------------|-----------------|-----------------|-----------------|
| <b>Data collection and processing</b>                 |                 |                        |                 |                 |                 |
| Type of electron microscope                           | Talos Arctica   | Titan Krios            | Titan Krios     | Titan Krios     | Talos Arctica   |
| Type of direct detection camera                       | Gatan K2 camera | Gatan K2 camera        | Gatan K2 camera | Gatan K2 camera | Gatan K2 camera |
| Voltage (kV)                                          | 200             | 300                    | 200             | 300             | 200             |
| Nominal magnification                                 | 165,000         | 165,000/215,000        | 215,000         | 215,000         | 215,000         |
| Electron exposure (e <sup>-</sup> /Å <sup>2</sup> )   | 50              | 60                     | 60              | 70              | 70              |
| Defocus range (µm)                                    | -0.5 ~ -1.6     | -0.6 ~ -1.6            | -0.6 ~ -1.6     | -0.6 ~ -1.6     | -0.6 ~ -1.6     |
| Pixel size (Å)                                        | 0.588           | 0.82/0.65 <sup>a</sup> | 0.65            | 0.65            | 0.65            |
| Symmetry imposed                                      | O               | D2                     | D3              | D2              | C2              |
| Initial particle images (no.)                         | 351,565         | 653,922 <sup>b</sup>   | 35,587          | 769,925         | 874,836         |
| Final particle images (no.)                           | 108,183         | 195,077                | 18,419          | 228,832         | 58,828          |
| Map resolution (Å)                                    | 1.96            | 2.28                   | 2.28            | 3.34            | 3.6             |
| FSC threshold                                         | 0.143           | 0.143                  | 0.143           | 0.143           | 0.143           |
| Map resolution range (Å)                              | 1.9 - 2.2       | 2.2 - 2.7              | 2.0 - 3.5       | 3.1 - 4.0       | 3.5 - 4.0       |
| Rosenthal-Henderson <i>B</i> factor (Å <sup>2</sup> ) | 87.8            | 79.3                   | 76.0            | 156.3           | 162.2           |
| <b>Model building and refinement</b>                  |                 |                        |                 |                 |                 |
| Initial model (PDB code)                              | 7K3V            | 1DGH                   | 3JCZ            | 6V20            | 5N11            |
| Model-to-map resolution (Å)                           | 1.9             | 2.5                    | 2.4             | 3.5             | 3.7             |
| FSC threshold                                         | 0.5             | 0.5                    | 0.5             | 0.5             | 0.5             |
| Model composition                                     |                 |                        |                 |                 |                 |
| Non-hydrogen atoms                                    | 38,201          | 16,430                 | 23,292          | 10,476          | 4555            |
| Protein residues                                      | 4128            | 1991                   | 2976            | 1372            | 574             |
| Ligands                                               | 329             | 8                      | 0               | 0               | 4               |
| <i>B</i> factors (Å <sup>2</sup> )                    |                 |                        |                 |                 |                 |
| Protein                                               | 4.46            | 23.18                  | 32.26           | 57.56           | 36.75           |
| Ligands                                               | 21.30           | 16.71                  | /               | /               | 11.06           |
| Water                                                 | 3.43            | /                      | /               | /               | /               |
| R.m.s. deviations                                     |                 |                        |                 |                 |                 |
| Bond lengths (Å)                                      | 0.002           | 0.005                  | 0.003           | 0.002           | 0.003           |
| Bond angles (°)                                       | 0.558           | 0.733                  | 0.538           | 0.523           | 0.529           |
| Validation                                            |                 |                        |                 |                 |                 |
| MolProbity score                                      | 1.10            | 1.92                   | 1.81            | 1.68            | 1.16            |
| Clashscore                                            | 2.67            | 8.58                   | 7.91            | 9.54            | 3.76            |
| Rotamer outliers (%)                                  | 0               | 1.75                   | 2.20            | 0               | 0               |
| Ramachandran plot (%)                                 |                 |                        |                 |                 |                 |
| Favored                                               | 97.79           | 95.97                  | 97.37           | 96.99           | 98.06           |
| Allowed                                               | 2.21            | 4.03                   | 2.63            | 3.01            | 1.94            |
| Disallowed                                            | 0               | 0                      | 0               | 0               | 0               |

- 1 <sup>a</sup>For catalase, different datasets were collected with different magnification of 165,000
- 2 and 215,000, corresponding to different pixel size of 0.82 Å and 0.65 Å, respectively.
- 3 <sup>b</sup>Particles picked from different datasets with different pixel sizes. The particles were
- 4 then combined using RELION 3.1.
- 5
